# Supplementary material for: Niraparib (MK-4827), a novel poly(ADP-Ribose) polymerase inhibitor, radiosensitizes human lung and breast cancer cells
Source: PubMed Central journal article supplement (PMC4148123; doi:10.18632/oncotarget.2083), 2014-06-09
Supplement: oncotarget-05-5076-s001.pdf [file oncotarget-05-5076-s001.pdf]

**Niraparib (MK-4827), a novel poly(ADP-Ribose) polymerase inhibitor, radiosensitizes human lung and breast cancer cells**

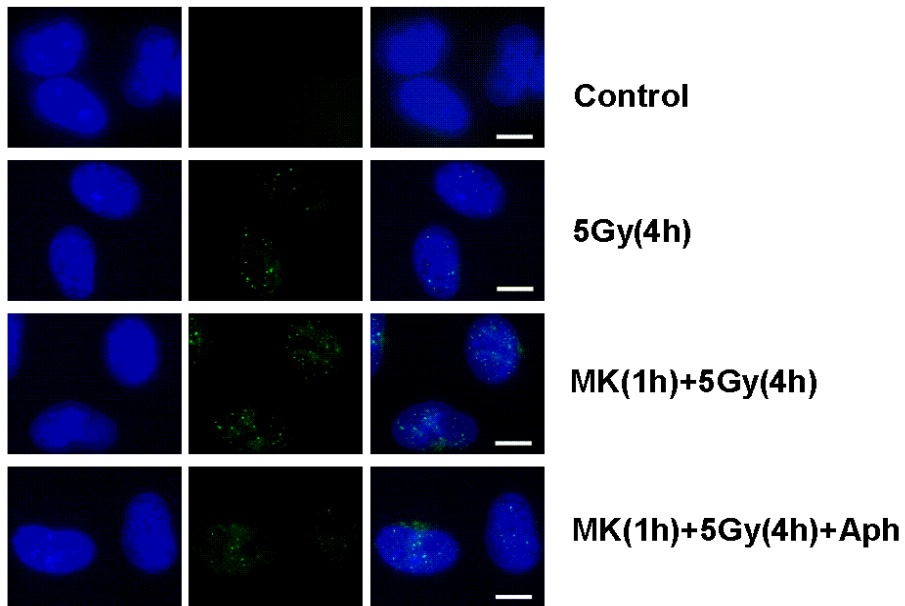

Figure S1: Representative photomicrographs of RAD51 foci from Figure 4D. Bar is 10 microns.
